# Supplementary material
Source: PubMed Central journal article supplement (PMC6214802)
Supplement: NIHMS964585-supplement-Supp_info.pdf [file NIHMS964585-supplement-Supp_info.pdf]

## SUPPLEMENTARY INFORMATION

### THE AER2 RECEPTOR FROM *VIBRIO CHOLERAE* IS A DUAL PAS-HEME OXYGEN SENSOR

Suzanne E. Greer-Phillips<sup>1</sup>, Nattakan Sukomon<sup>2,3</sup>, Teck Khiang Chua<sup>3</sup>, Mark S. Johnson<sup>1</sup>,  
Brian R. Crane<sup>3</sup>, and Kylie J. Watts<sup>1#</sup>

RUNNING TITLE: *V. cholerae* Aer2 is a Dual PAS-Heme O<sub>2</sub> Receptor

<sup>1</sup>Division of Microbiology and Molecular Genetics  
Loma Linda University  
Loma Linda, CA, 92350, USA

<sup>2</sup>Current address: Department of Anesthesiology  
Weill Cornell Medical College  
New York, NY, 10065, USA

<sup>3</sup>Department of Chemistry and Chemical Biology  
Cornell University  
Ithaca, NY, 14850, USA

#Corresponding author:  
Telephone: +1 (909) 558-1000 x83394  
Fax: +1 (909) 558-4035  
Email: kwatts@llu.edu

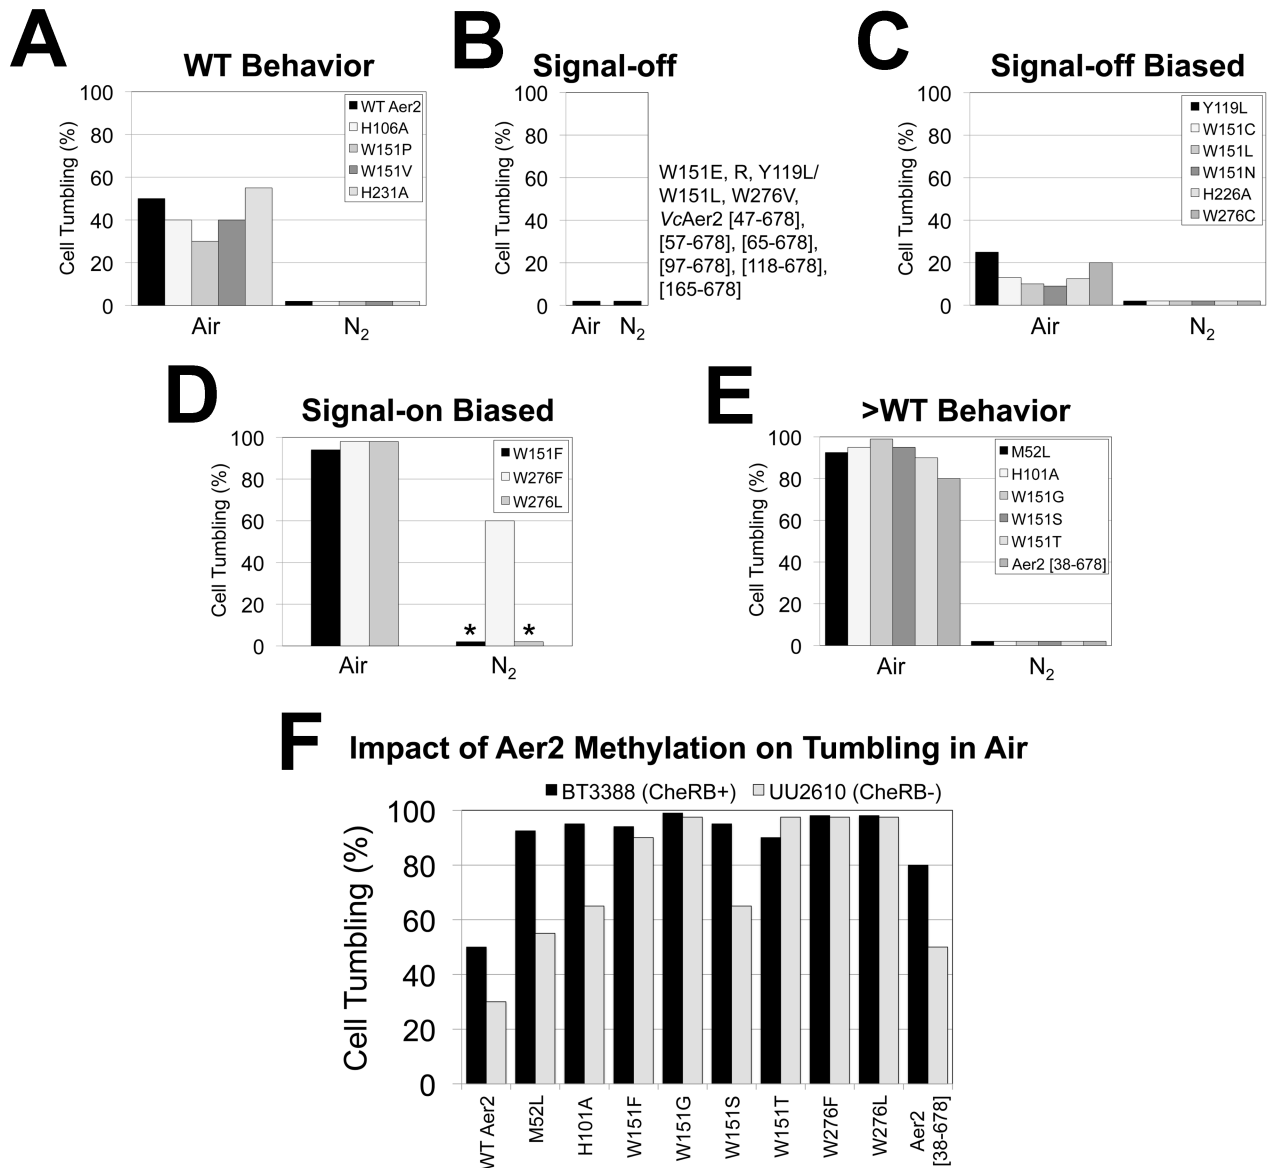

**Fig. S1.** Average percentage of *E. coli* BT3388 (A-F) and *E. coli* UU2610 (F) cells tumbling in the presence of full-length and N-terminally-truncated VcAer2 proteins. All cultures contained 25  $\mu\text{g ml}^{-1}$  ALA and were induced for 2 h with 200  $\mu\text{M}$  IPTG. Percentages represent steady-state tumbling in air (A-F) and in N<sub>2</sub> (A-E). All signal-off receptors in (B) are represented by the one set of bar graphs. Compared with WT VcAer2, the signal-on biased receptors containing W151F and W276L (D) both had 20-50 sec smooth-swimming delays in N<sub>2</sub> that are represented by an asterisk.

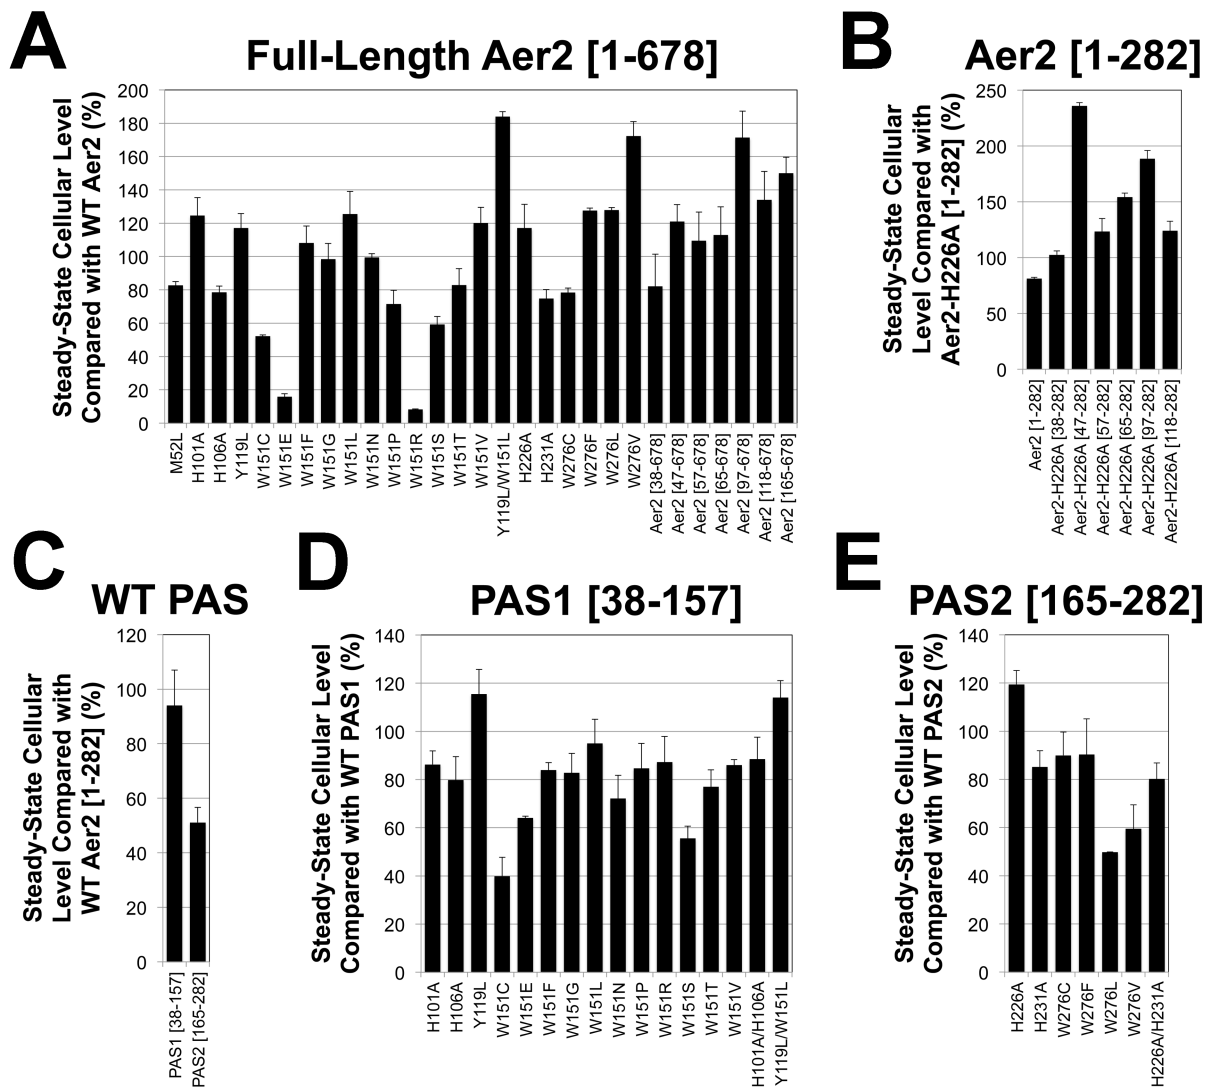

**Fig. S2.** Average steady-state cellular levels of full-length *VcAer2* proteins and peptides in *E. coli* BT3388. Protein levels were determined from Western blots. Error bars represent standard deviations from two to five experiments.

**A.** Steady-state levels of full-length *VcAer2* proteins and N-terminal truncation mutants compared with full-length WT *VcAer2* after inducing with 50  $\mu$ M IPTG. *VcAer2*-W151E and *VcAer2*-W151R were instead induced with 200  $\mu$ M IPTG.

**B.** Steady-state levels of the N-terminally truncated PAS1-2 peptides containing H226A compared with *VcAer2*-H226A [1-282] after inducing with 50  $\mu$ M IPTG.

**C.** Steady-state levels of WT PAS1 [38-157] and PAS2 [165-282] peptides compared with WT VcAer2 [1-282] after inducing with 100  $\mu$ M IPTG.

**D.** Steady-state levels of PAS1 peptides compared with WT PAS1 [38-157] after inducing expression with 100  $\mu$ M IPTG. PAS1-W151E, PAS1-W151N, and PAS1-W151R were instead induced with 200  $\mu$ M IPTG.

**E.** Steady-state levels of PAS2 peptides compared with WT PAS2 [165-282] after inducing expression with 100  $\mu$ M IPTG.

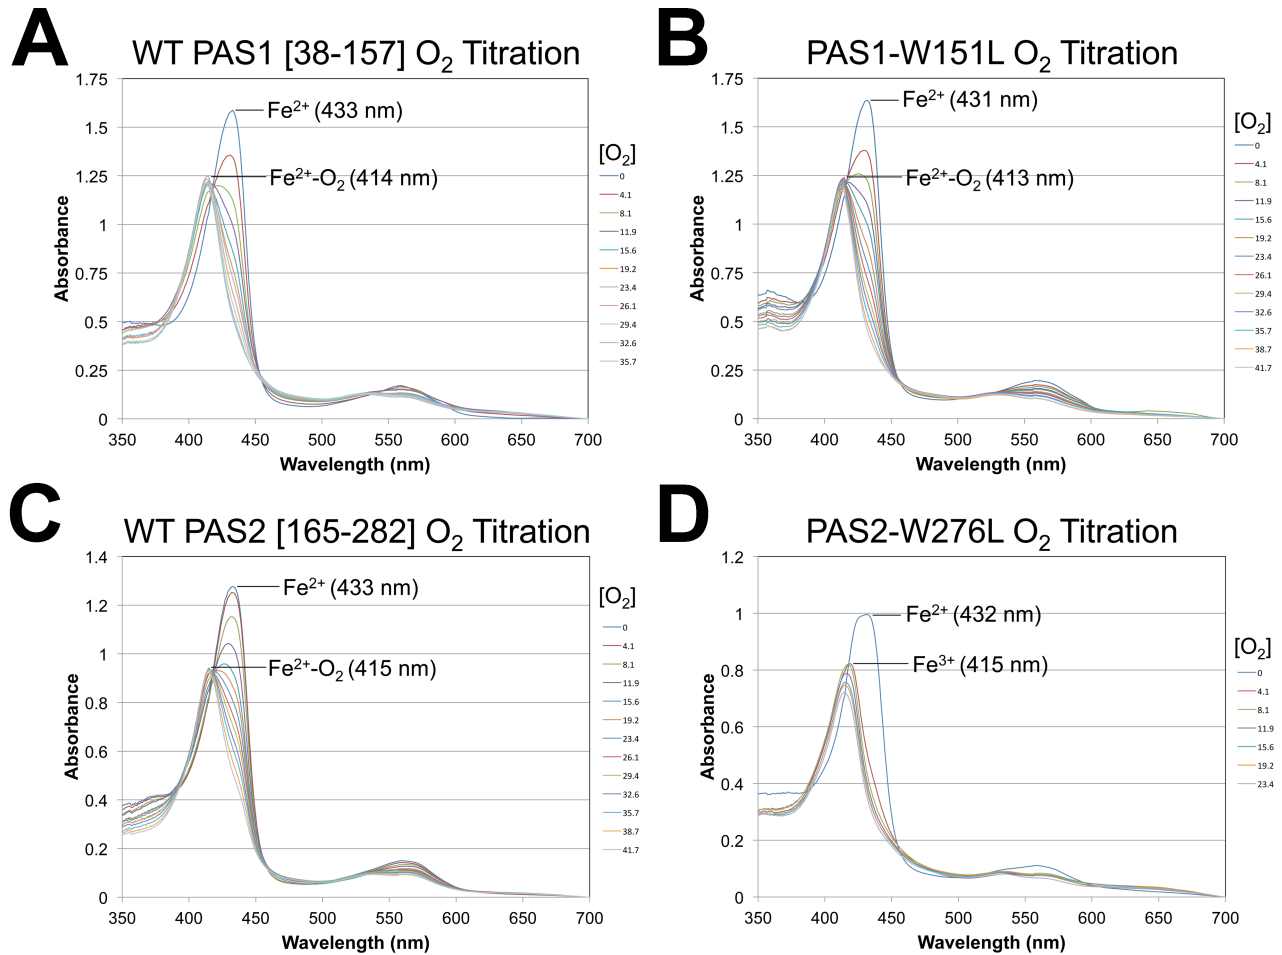

**Fig. S3.** Example gas titrations using 10  $\mu$ M purified PAS1 [38-157] or PAS2 [165-282] peptides.

**A-B.** WT deoxy-PAS1 (A) and deoxy-PAS1-W151L (B) peptides titrated with 5  $\mu$ l aliquots of air-saturated buffer. WT PAS1 and PAS1-W151L both bind O<sub>2</sub>.

**C-D.** WT deoxy-PAS2 (C) and deoxy-PAS2-W276L (D) peptides titrated with 5  $\mu$ l aliquots of air-saturated buffer. PAS2-W276L shows rapid oxidation to met-heme (with a solet maximum of 415 nm). The designation of met-heme instead of oxy-heme, was verified spectrophotometrically after oxidizing PAS peptide with potassium ferricyanide and comparing the spectra.

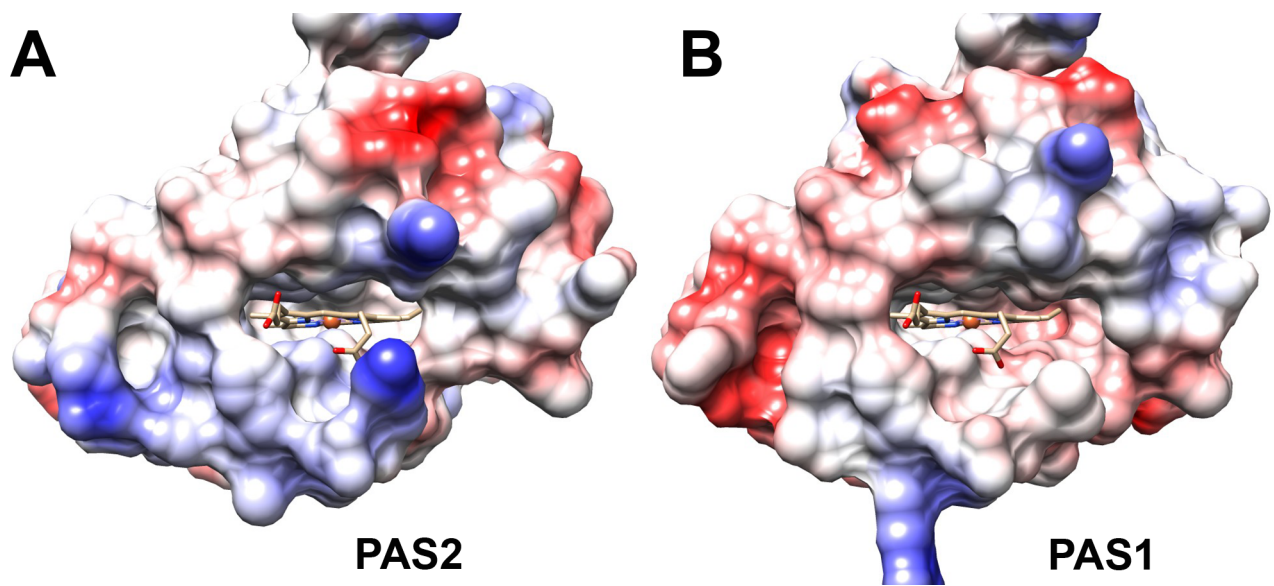

**Fig. S4.** Homology molecular surface models of the PAS1 and PAS2 domains of *VcAer2*, showing differences in electrostatic potential surrounding the heme pocket (red, negative charge; blue, positive charge). PAS1 (B) has a more negative potential within the heme pocket than PAS2 (A).

**Table S1.** Data collection and refinement statistics for VcAer2 PAS2-W276L

---

|                                   |                            |
|-----------------------------------|----------------------------|
| Wavelength (Å)                    | 0.62790                    |
| Resolution range                  | 27.16 - 1.67 (1.73 - 1.67) |
| Space group                       | P 3 <sub>2</sub> 2 1       |
| Unit cell dimensions              |                            |
| a, b, c (Å)                       | 62.51, 62.51, 157.02       |
| $\alpha$ , $\beta$ , $\gamma$ (°) | 90, 90, 120                |
| Unique reflections                | 42171 (4,146)              |
| Completeness (%)                  | 99.60 (98.15)              |
| Wilson B-factor                   | 24.16                      |
| R-work                            | 0.2070 (0.3376)            |
| R-free                            | 0.2411 (0.3648)            |
| Number of non-hydrogen atoms      | 3022                       |
| Macromolecules                    | 2569                       |
| Ligands                           | 129                        |
| Protein residues                  | 336                        |
| RMS(bonds)                        | 0.012                      |
| RMS(angles)                       | 1.09                       |
| Ramachandran favored (%)          | 99.39                      |
| Ramachandran allowed (%)          | 0.61                       |
| Ramachandran outliers (%)         | 0                          |
| Rotamer outliers (%)              | 0.36                       |
| Clashscore                        | 8.69                       |
| Average B-factor                  | 30.25                      |
| Macromolecules                    | 29.44                      |
| Ligands                           | 24.11                      |
| Solvent                           | 39.04                      |

---
